# Supplementary material for: Natural Selection Drives Rapid Functional Evolution of Young Drosophila Duplicate Genes
Source: PubMed Central journal article supplement — Mol Biol Evol. 2017 Aug 30;34(12):3089–98. doi: 10.1093/molbev/msx230 (PMC5850746; doi:10.1093/molbev/msx230), 2017-08-30
Supplement: msx230_supp.pdf [file msx230_supp.pdf]

## SUPPLEMENTAL MATERIAL

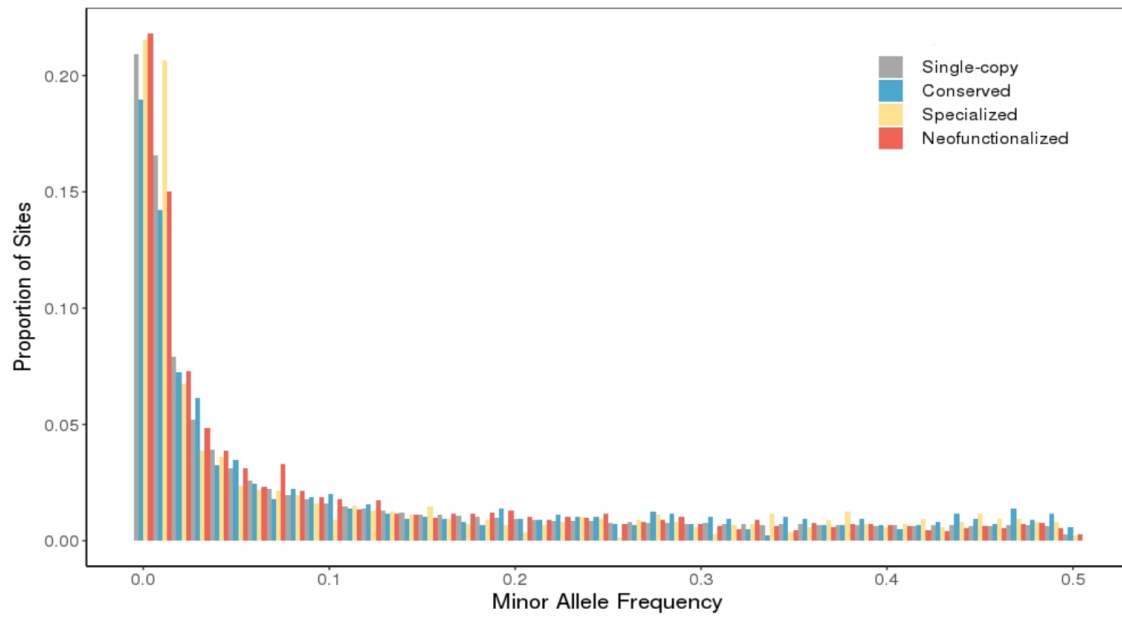

**Figure S1.** Minor allele frequency spectra of *D. melanogaster* single-copy, conserved, specialized, and neofunctionalized genes.
